# Supplementary material for: Quantitative evaluation of the biological activity of various brassinosteroids using spiral root induction in rice seeds
Source: PubMed Central journal article supplement — J Pestic Sci. 2023 Nov 20;48(4):218–24. doi: 10.1584/jpestics.D23-044 (PMC10710930; doi:10.1584/jpestics.d23-044), 2023-11-20
Supplement: jps-48-4-D23-044-s001.pdf [file jps-48-4-D23-044-s001.pdf]

## Supplement Fig. S1

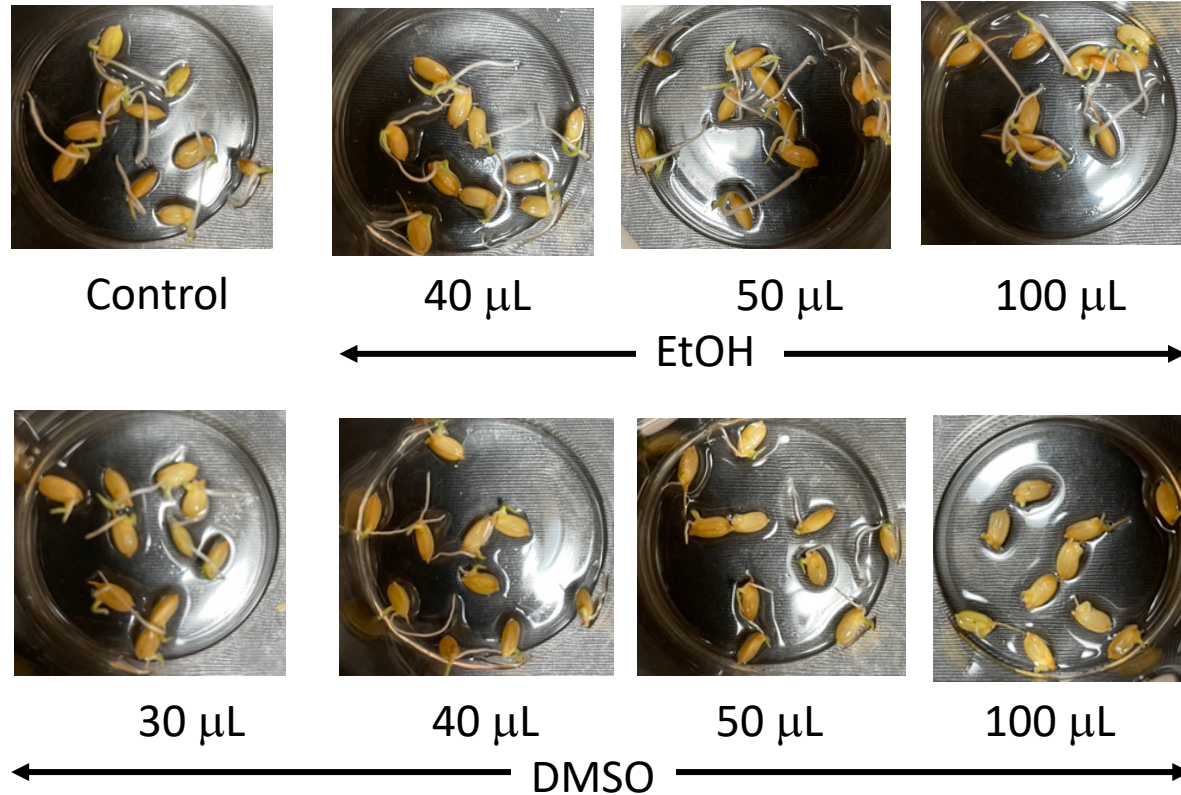

Fig. S1. Effect of solvents (EtOH and DMSO) on the root growth. Various of volumes of EtOH and DMSO were added to 2 ml of water.

## Supplement Fig. S2

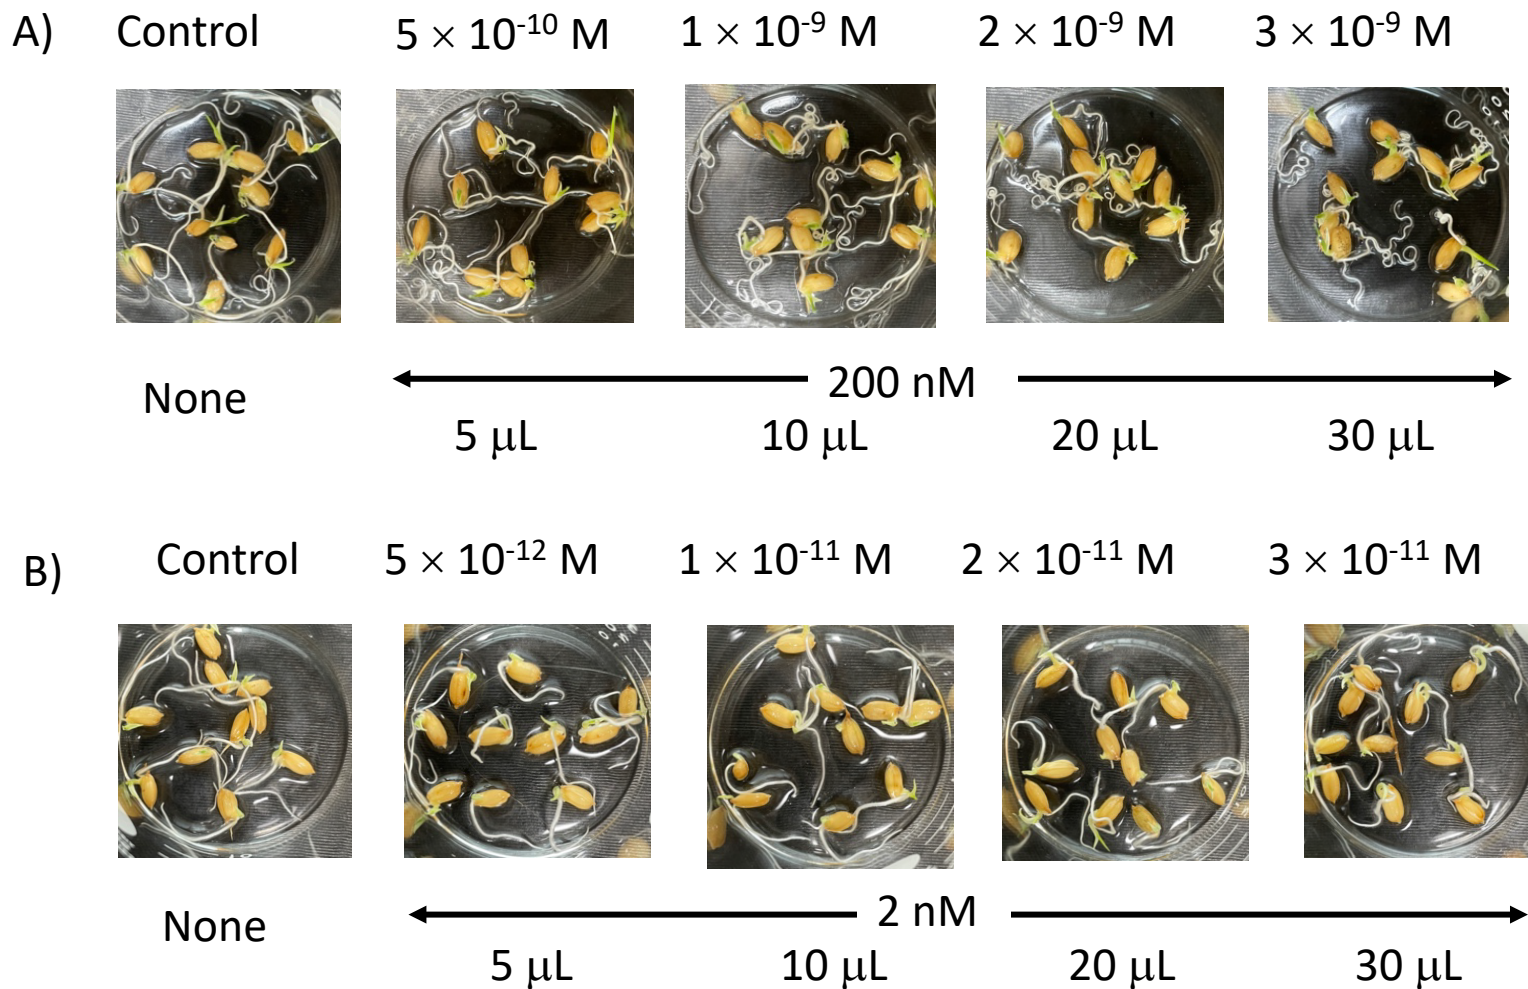

Fig. S2. Concentration-response was examined for brassinolide (**1**). Various volumes of 200 nM (A) and 2 nM (B) of stock solutions were added to the 2 ml of water. All treatments in (A) are effective, but all treatments in (B) were not effective.

Supplement Fig. S3

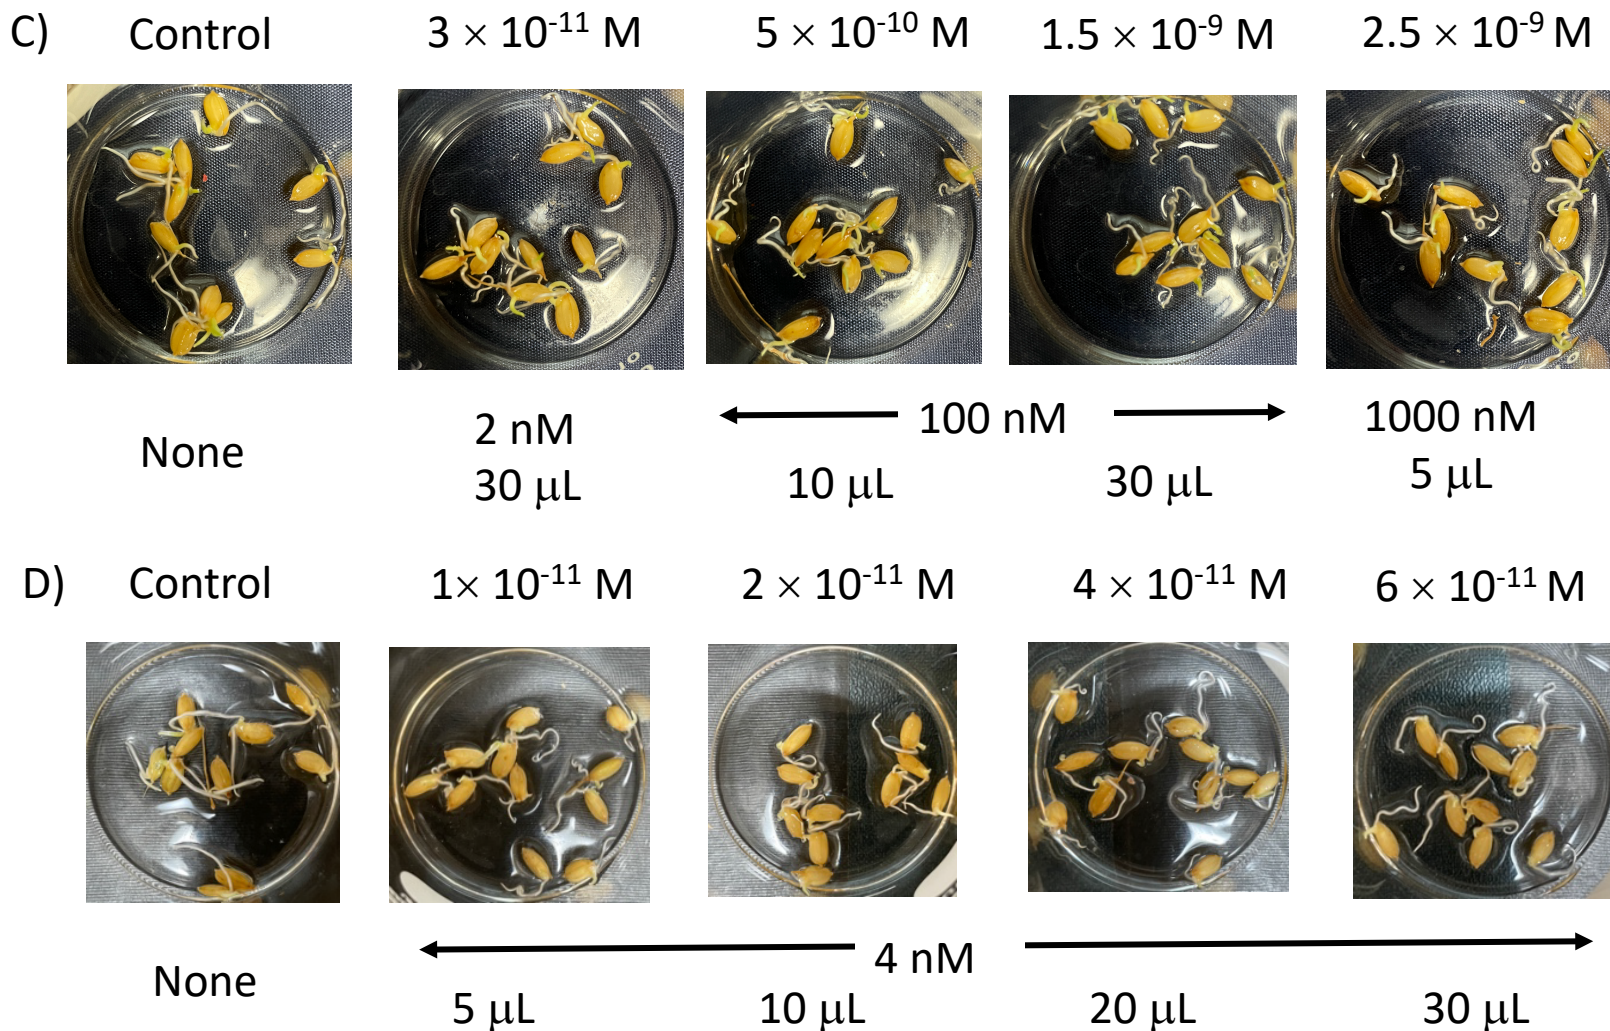

Fig. S3. Concentration-response was examined for brassinolide (**1**). Various volumes of various stock solutions (2 nM, 4 nM, 100 nM and 1000 nM) were added to 2 ml of water. In these experiments, we determined that treatments with the concentration lower than  $4 \times 10^{-11}$  M was not effective, but treatments with higher than  $6 \times 10^{-11}$  M were effective.

## Supplement Fig. S4

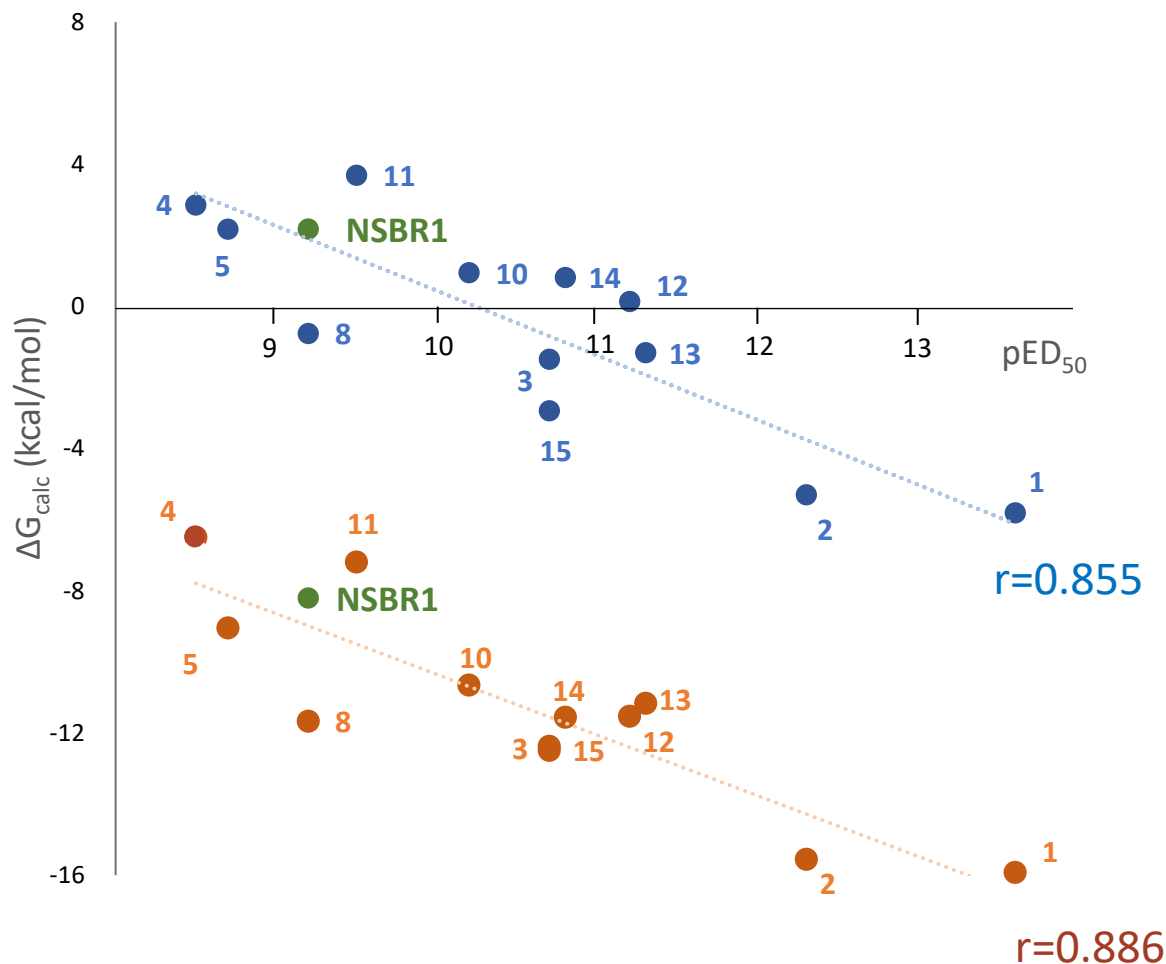

Fig. S4. Relationship between the  $\Delta G_{\text{bind}}$  calculated in the MM/PBSA and the  $\text{pED}_{50}$  measured in the RLIA.  $\Delta G_{\text{bind}}$  included in blue line is calculated using the lowest interior dielectric constant ( $\epsilon_i=1$ ), and that for red line is calculated using  $\epsilon_i=2$ . Numbers correspond to the compound number listed in Table 1.  $\Delta G_{\text{bind}}$  is corrected by adding  $\Delta G_{\text{conf\_ligand}}$  (Ref. 25).
